# Supplementary material
Source: PubMed Central journal article supplement (PMC2756583)
Supplement: NIHMS103057-supplement-2.pdf [file NIHMS103057-supplement-2.pdf]

# Declaration of competing financial interests

JOURNAL: Nature  
2008-08-08938C

MANUSCRIPT NUMBER:

MANUSCRIPT TITLE: CBP/p300 mediated acetylation of  
histone H3 on lysine 56

Please check one of the following:

1. I declare that the authors have no competing interests as defined by Nature Publishing Group, or other interests that might be perceived to influence the results and discussion reported in this paper.
2. The authors have competing interests as defined by Nature Publishing Group, or other interests that might be perceived to influence the results and discussion reported in this paper.

If you have checked 2, please specify the competing interests:

SIGNATURE: Jessica Tyler

NAME IN BLOCK CAPITALS: Jessica Tyler

DATE: 1/25/09

The Nature journals' competing financial interests policy is defined, and further details of our procedures are explained, at:

[http://www.nature.com/authors/editorial\\_policies/competing.html](http://www.nature.com/authors/editorial_policies/competing.html)
