# Supplementary material
Source: PubMed Central journal article supplement (PMC2756583)
Supplement: NIHMS103057-supplement-4.pdf [file NIHMS103057-supplement-4.pdf]

# nature

Corresponding Author Name and Address:

Nature Manuscript Reference Number:

## COLOUR FIGURES IN *NATURE*

With the rising demand for colour illustrations and the increasing cost of reproducing them, *Nature* has been forced to adopt the policy of many other journals in asking authors to contribute towards the cost of colour reproduction. Our current charge is £700 for the first colour figure and £250 for each additional figure. (Please note that in EU countries VAT will be added if you are unable to provide us with your VAT details below).

Each paper will be assessed individually following publication, when you will be billed. If you are unable to meet the costs your bill will be waived, provided we agree that colour is essential and you explain the circumstances before your paper is published.

PLEASE COMPLETE AND SIGN THE SECTION BELOW, DELETING WHICHEVER ALTERNATIVE DOES NOT APPLY, AND RETURN A COPY OF THIS SHEET TO *NATURE*.

- I agree to pay the sum requested by *Nature* in the event that colour is considered essential.
- I am unable to meet the costs of colour for the following reason:

For EU member countries, please tick the box and provide VAT number if your Institution/University is exempt from VAT:

- My Institution/University is a VAT registered paying member of the EU, with the VAT number below

VAT NUMBER 

|  |  |  |  |  |  |  |  |  |  |  |  |  |  |  |  |  |  |  |  |
|--|--|--|--|--|--|--|--|--|--|--|--|--|--|--|--|--|--|--|--|
|  |  |  |  |  |  |  |  |  |  |  |  |  |  |  |  |  |  |  |  |
|--|--|--|--|--|--|--|--|--|--|--|--|--|--|--|--|--|--|--|--|

Signed: *Jessica Tyler*

Name in block letters: *Jessica Tyler*
